# Supplementary material for: Seismic amplitude response to internal heterogeneity of mass-transport deposits
Source: Copernicus journal article supplement (doi:10.5194/egusphere-2022-733), 2022-09-09
Supplement: Supplementary file 1 [file egusphere-2022-733-supplement.pdf]

# **Supporting information: Seismic amplitude response to internal heterogeneity of mass-transport deposits**

Jonathan Ford<sup>1</sup>, Angelo Camerlenghi<sup>1</sup>, Francesca Zolezzi<sup>2</sup>, and Marilena Calarco<sup>2</sup>

<sup>1</sup>National Institute of Oceanography and Applied Geophysics – OGS, Trieste, Italy

<sup>2</sup>RINA Consulting, Genova, Italy

**Correspondence:** J. Ford (jford@inogs.it)

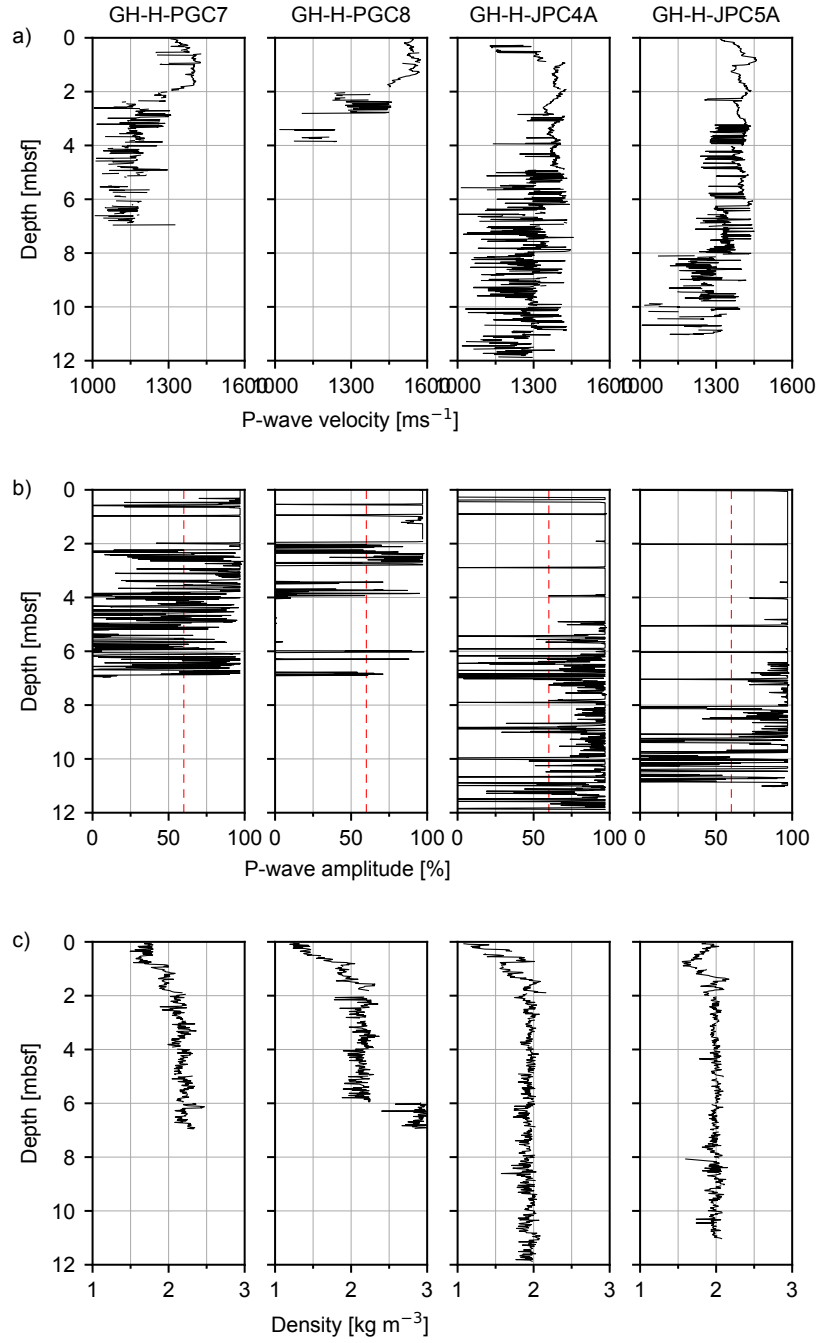

**Figure S1.** Multi-sensor core logger (MSCL) results from cores GH-H-PGC7, GH-H-PGC8, GH-H-JPC4A and GH-H-JPB5A. a) P-wave velocity, b) P-wave amplitude (60% cutoff marked), c) density, d) cross-plot of P-wave velocity and density logs, for depth intervals where the P-wave amplitude exceeds the 60% cutoff. Parameters for the water layer and the two component sediment lithologies used in the realistic multi-source synthetic experiment (Section 3.2) (cont.)

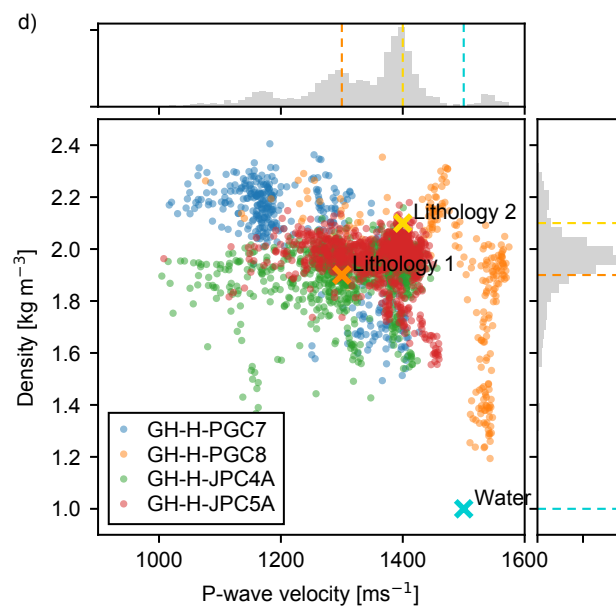

**Figure S1.**

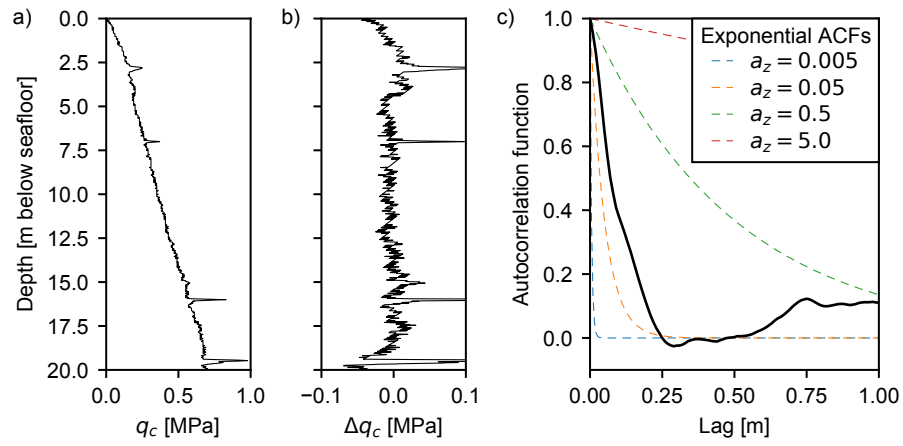

**Figure S2.** Cone-penetration test (CPT) results for site GH-T-PCPT7. a) Cone-tip resistance ( $q_c$ ) log, b) De-trended cone-tip resistance log ( $\Delta q_c$ ), de-trended with a best fit linear trend, c) Autocorrelation function (ACF) of the cone-tip resistance log.



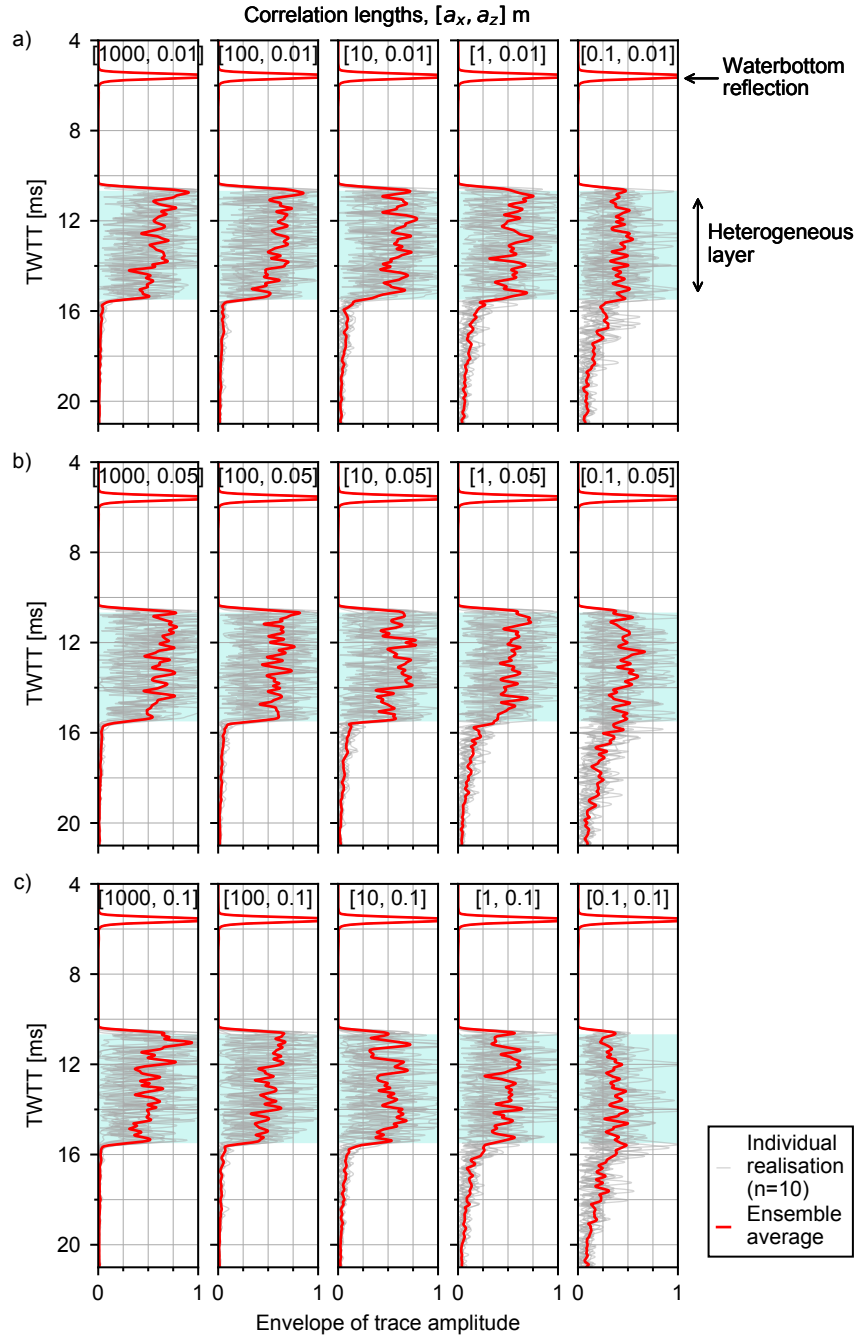

**Figure S3.** Envelope of trace amplitude for individual realisations (grey) and the RMS envelope of the single-source synthetic experiment for each unique set of correlation lengths (red) for vertical correlation lengths  $a_z = \{0.01, 0.05, 0.1, 0.5, 1\}$  m (a-e) and lateral correlation lengths  $a_x = \{1000, 100, 10, 1, 0.1\}$  m (left to right). The two-way traveltime (TWTT) extent of the heterogeneous layer is shaded in blue.

(cont.)

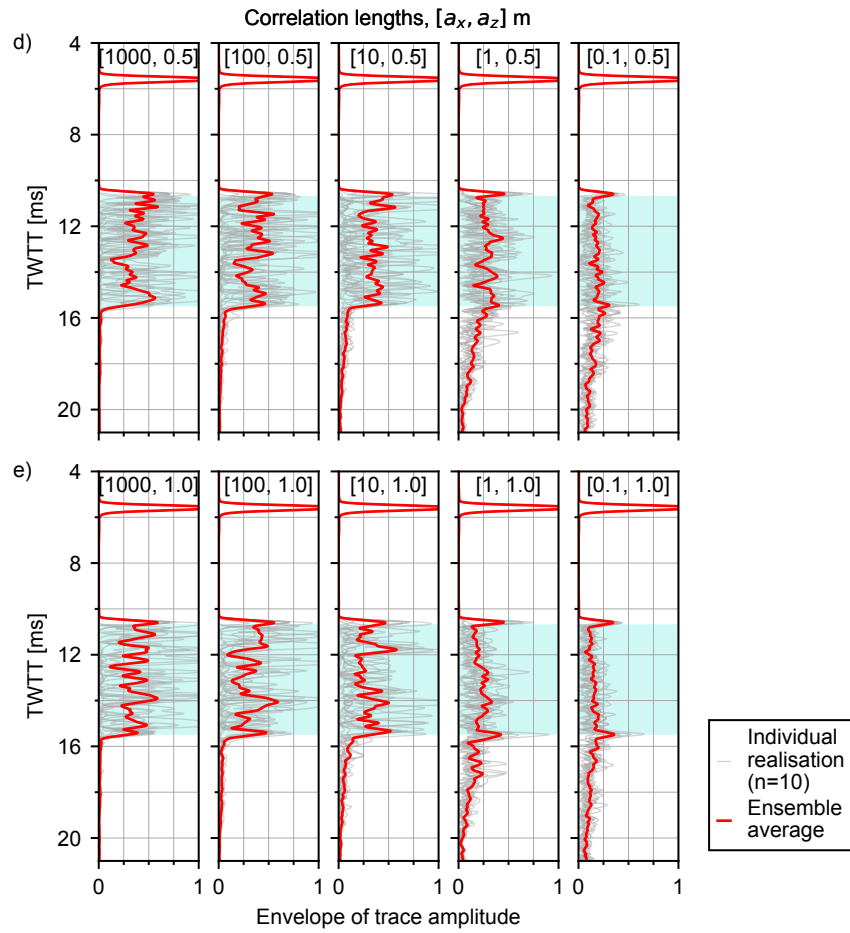

**Figure S3.**

Seed: 3021

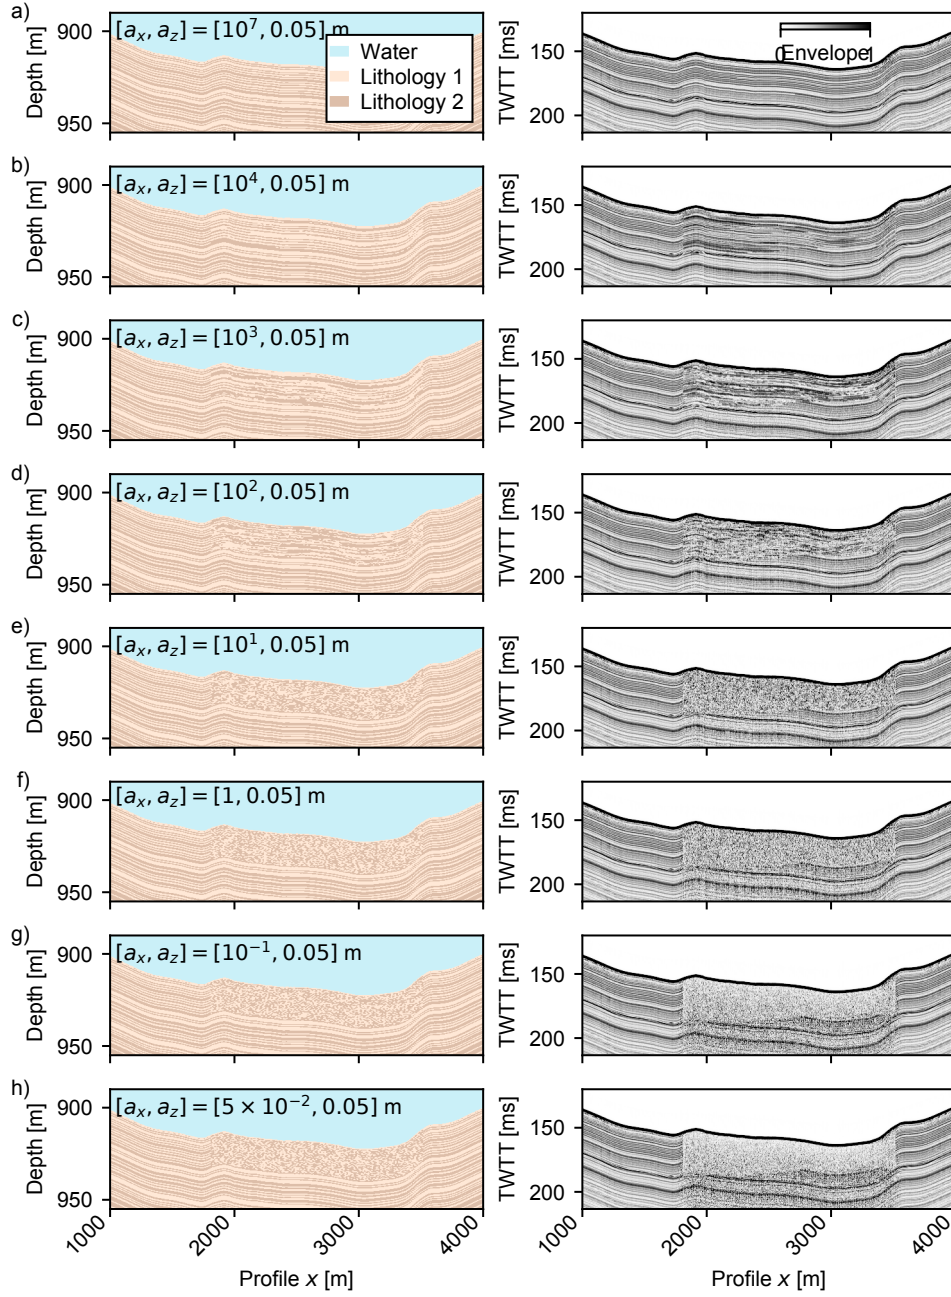

**Figure S4.** Realisations of the realistic multi-source synthetic experiment models (left) and resulting synthetic sub-bottom profiles (right) for seed 3021, lateral scale lengths  $a_x = \{1 \times 10^7, 1 \times 10^4, 1000, 100, 10, 1, 0.1, 0.05\}$  (a-h) and vertical scale length  $a_z = 0.05$  m.

Seed: 3022

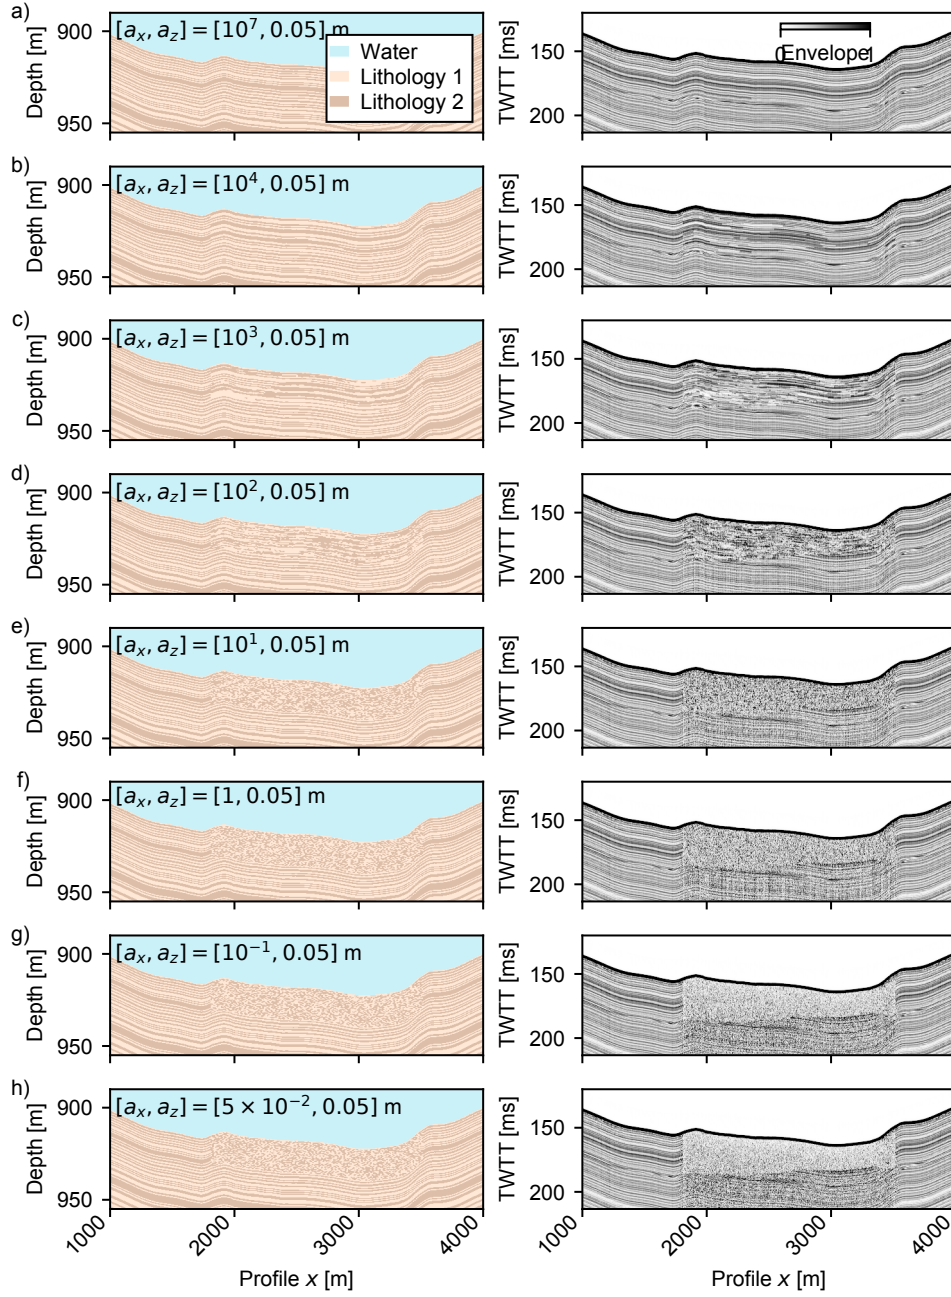

**Figure S5.** Realisations of the realistic multi-source synthetic experiment models (left) and resulting synthetic sub-bottom profiles (right) for seed 3022, lateral scale lengths  $a_x = \{1 \times 10^7, 1 \times 10^4, 1000, 100, 10, 1, 0.1, 0.05\}$  (a-h) and vertical scale length  $a_z = 0.05$  m.

Seed: 3023

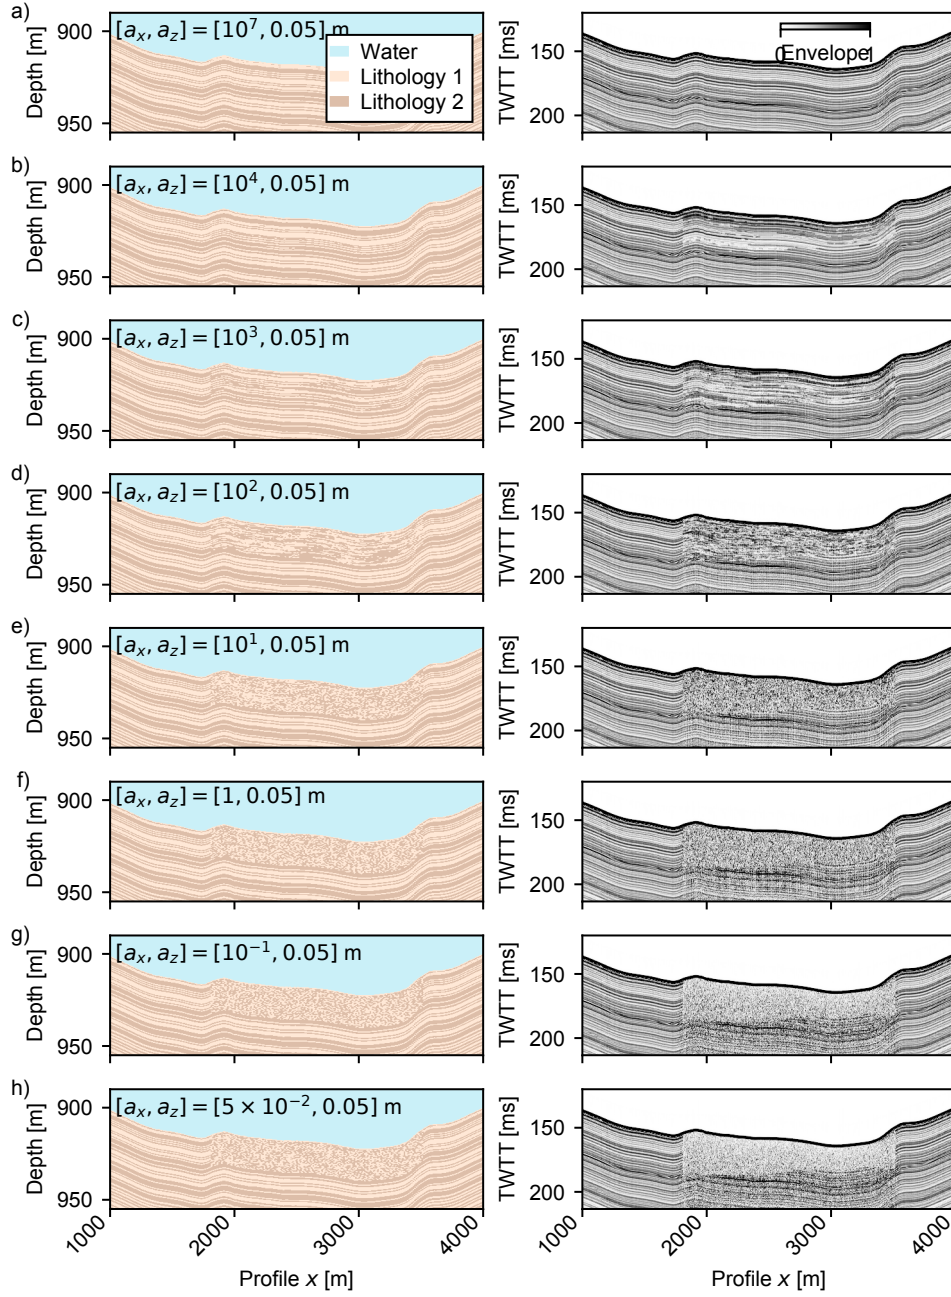

**Figure S6.** Realisations of the realistic multi-source synthetic experiment models (left) and resulting synthetic sub-bottom profiles (right) for seed 3023, lateral scale lengths  $a_x = \{1 \times 10^7, 1 \times 10^4, 1000, 100, 10, 1, 0.1, 0.05\}$  (a-h) and vertical scale length  $a_z = 0.05$  m.



Seed: 3023



**Figure S7.** Realisations of the realistic multi-source synthetic experiment models (left) and resulting synthetic sub-bottom profiles (right) for seed 3024, lateral scale lengths  $a_x = \{1 \times 10^7, 1 \times 10^4, 1000, 100, 10, 1, 0.1, 0.05\}$  (a-h) and vertical scale length  $a_z = 0.05$  m.

Seed: 3024

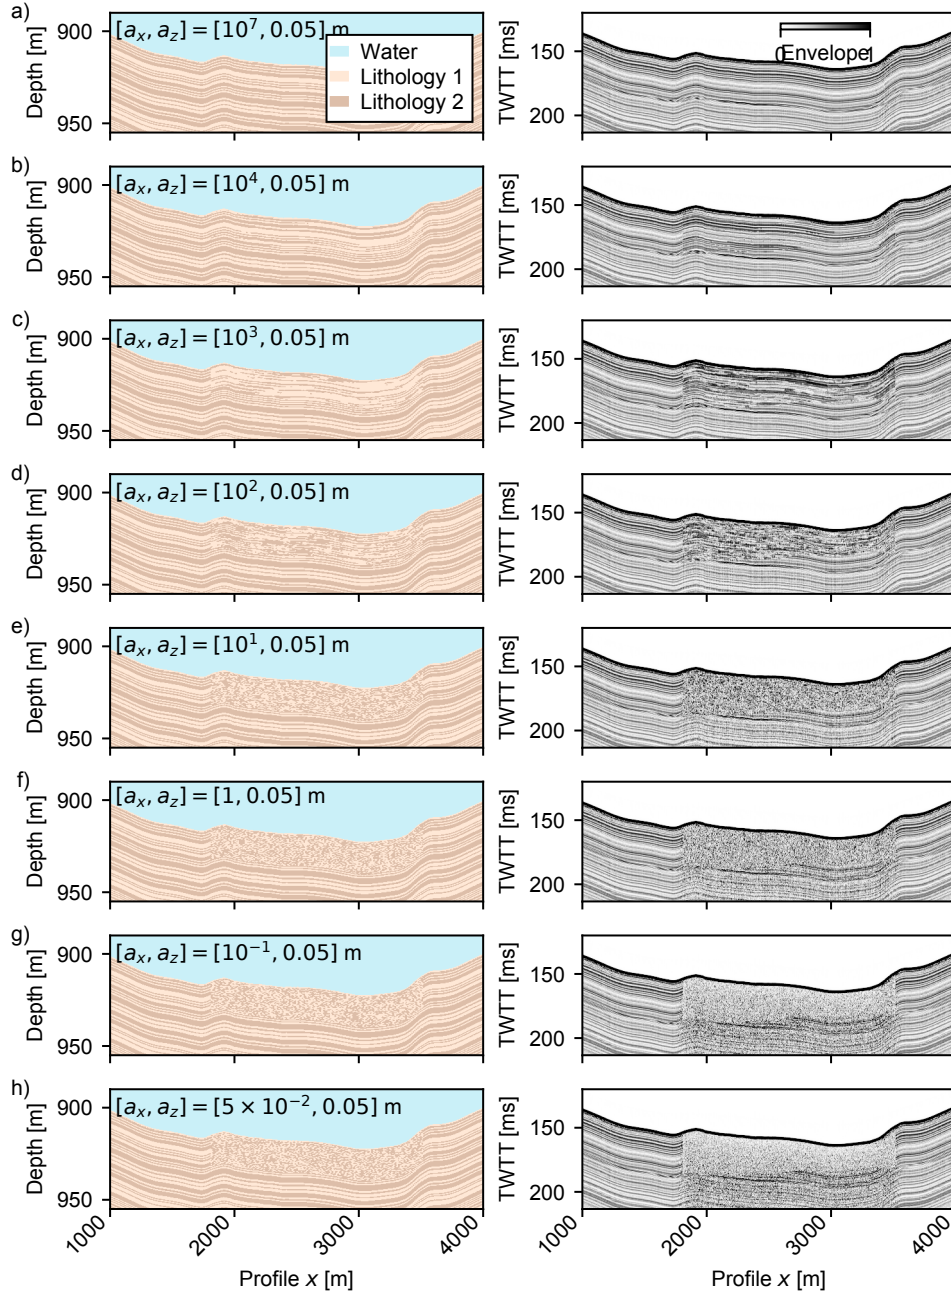

**Figure S8.** Realisations of the realistic multi-source synthetic experiment models (left) and resulting synthetic sub-bottom profiles (right) for seed 3025, lateral scale lengths  $a_x = \{1 \times 10^7, 1 \times 10^4, 1000, 100, 10, 1, 0.1, 0.05\}$  (a-h) and vertical scale length  $a_z = 0.05$  m.
